# Supplementary material for: Single-Cell RNA-seq Reveals Angiotensin-Converting Enzyme 2 and Transmembrane Serine Protease 2 Expression in TROP2+ Liver Progenitor Cells: Implications in Coronavirus Disease 2019-Associated Liver Dysfunction
Source: PubMed Central journal article supplement (PMC8100026; doi:10.3389/fmed.2021.603374), 2021-04-22

# Supplementary Figure-1

(A) Clustering of liver epithelial cells

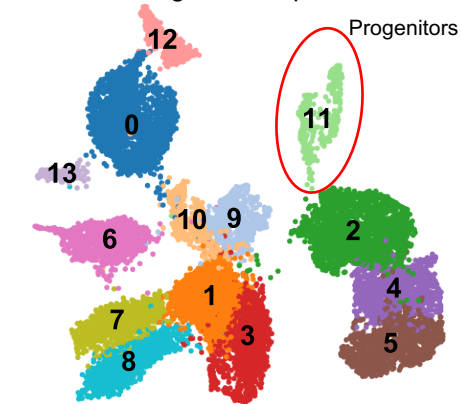

(B) Color by normal and tumor

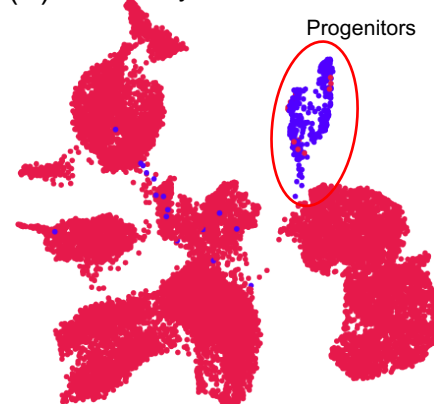

(C) Color by sample ID

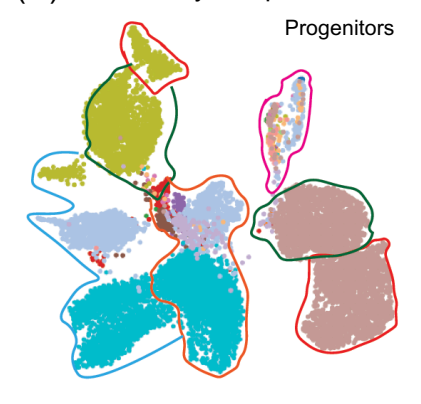

**Figure-2**

(D)

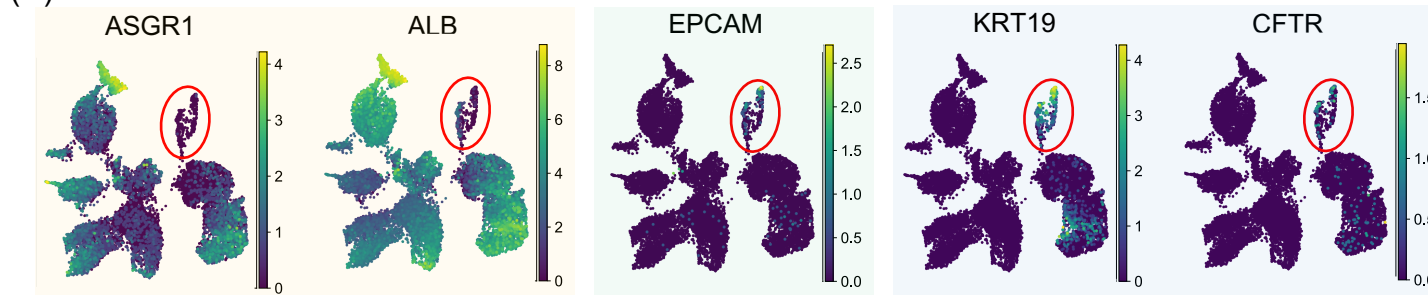

(E)

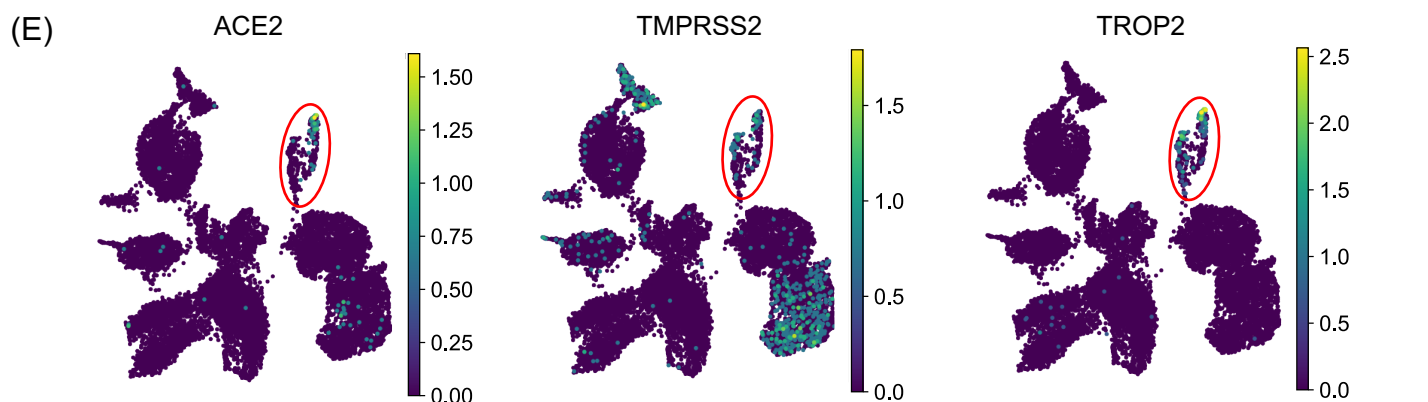

(F)

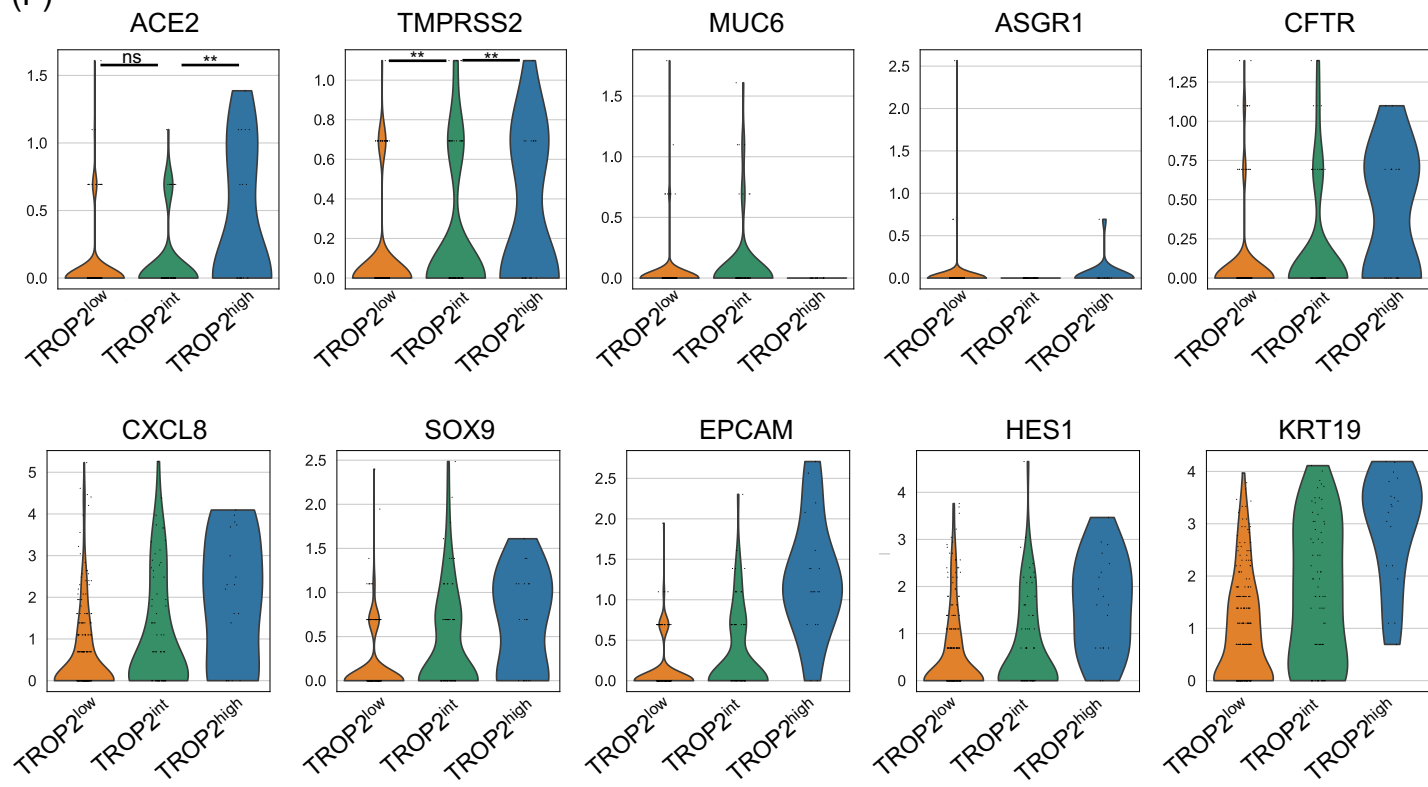

Supplement: Image_1.pdf [file Image_1.pdf]
